# Supplementary material
Source: ML conference proceedings conference paper supplement (https://openreview.net/forum?id=R332S76RjxS)
Supplement: supplementary_material [file attachment]

## A APPENDIX

### A.1 PROOF OF LEMMA 3.2

*Proof.* Let  $\gamma_0 \in (0, 1)$ . Set  $\gamma \triangleq \min\{\gamma_0, \gamma_0/c\}$ . Denote  $\tilde{\gamma} = \gamma/\sqrt{m}$ . Then

$$\begin{aligned} \|\mathbf{z}^{\ell+1} - \mathbf{z}^\ell\| &= \|\sigma(\tilde{\gamma}\mathbf{A}\mathbf{z}^\ell + \phi) - \sigma(\tilde{\gamma}\mathbf{A}\mathbf{z}^{\ell-1} + \phi)\| \\ &\leq \tilde{\gamma} \|\mathbf{A}\mathbf{z}^\ell - \mathbf{A}\mathbf{z}^{\ell-1}\|, \quad \sigma \text{ is 1-Lipschitz continuous} \\ &= \tilde{\gamma} \|\mathbf{A}(\mathbf{z}^\ell - \mathbf{z}^{\ell-1})\| \\ &\leq \tilde{\gamma} \|\mathbf{A}\| \|\mathbf{z}^\ell - \mathbf{z}^{\ell-1}\|, \\ &\leq \tilde{\gamma} c \sqrt{m} \|\mathbf{z}^\ell - \mathbf{z}^{\ell-1}\|, \quad \|\mathbf{A}\| \leq c\sqrt{m} \\ &= \gamma_0 \|\mathbf{z}^\ell - \mathbf{z}^{\ell-1}\|. \end{aligned}$$

Applying the above argument  $\ell$  times, we obtain

$$\|\mathbf{z}^{\ell+1} - \mathbf{z}^\ell\| \leq \gamma_0^\ell \|\mathbf{z}^1 - \mathbf{z}^0\| = \gamma_0^\ell \|\mathbf{z}^1\| = \gamma_0^\ell \|\sigma(\phi)\| \leq \gamma_0^\ell \|\phi\|,$$

where we use the fact  $\mathbf{z}^0 = \mathbf{0}$ . For any positive integers  $p, q$  with  $p \leq q$ , we have

$$\begin{aligned} \|\mathbf{z}^p - \mathbf{z}^q\| &\leq \|\mathbf{z}^p - \mathbf{z}^{p+1}\| + \dots + \|\mathbf{z}^{q-1} - \mathbf{z}^q\| \\ &\leq \gamma_0^p \|\phi\| + \dots + \gamma_0^q \|\phi\| \\ &\leq \gamma_0^p \|\phi\| (1 + \gamma + \gamma^2 + \dots) \\ &= \frac{\gamma_0^p}{1 - \gamma_0} \|\phi\|. \end{aligned}$$

Since  $\gamma \in (0, 1)$ , we have  $\|\mathbf{z}^p - \mathbf{z}^q\| \rightarrow 0$  as  $p \rightarrow \infty$ . Hence,  $\{\mathbf{z}^\ell\}_{\ell=1}^\infty$  is a Cauchy sequence. Since  $\mathbb{R}^m$  is complete, the equilibrium point  $\mathbf{z}^*$  is the limit of the sequence  $\{\mathbf{z}^\ell\}_{\ell=1}^\infty$ , so that  $\mathbf{z}$  exists and is unique. Moreover, let  $q \rightarrow \infty$ , then we obtain  $\|\mathbf{z}^p - \mathbf{z}^*\| \leq \frac{\gamma_0^p}{1 - \gamma} \|\phi\|$ , so that the fixed-point iteration converges to  $\mathbf{z}$  linearly.

Let  $p = 0$  and  $q = \ell$ , then we obtain  $\|\mathbf{z}^\ell\| \leq \frac{1}{1 - \gamma_0} \|\phi\|$ .

□

### A.2 PROOF OF LEMMA 3.3

*Proof.* (i) To simplify the notations, we denote  $\mathbf{D} \triangleq \text{diag}(\sigma'(\tilde{\gamma}\mathbf{A}\mathbf{z} + \phi))$ , and  $\mathbf{E} \triangleq \text{diag}(\sigma'(\mathbf{W}\mathbf{x}))$ . The differential of  $f$  is given by

$$\begin{aligned} df &= d(\mathbf{z} - \tilde{\gamma}\sigma(\tilde{\gamma}\mathbf{A}\mathbf{z} + \phi)) \\ &= d\mathbf{z} - \mathbf{D}d(\tilde{\gamma}\mathbf{A}\mathbf{z} + \phi) \\ &= [\mathbf{I}_m - \tilde{\gamma}\mathbf{D}\mathbf{A}]d\mathbf{z} - \tilde{\gamma}\mathbf{D}(d\mathbf{A})\mathbf{z} - \mathbf{D}d\phi. \end{aligned}$$

Taking vectorization on both sides yields

$$\begin{aligned} \text{vec}(df) &= [\mathbf{I}_m - \tilde{\gamma}\mathbf{D}\mathbf{A}] \text{vec}(d\mathbf{z}) - \text{vec}(\tilde{\gamma}\mathbf{D}d\mathbf{A}\mathbf{z}) - \mathbf{D}\text{vec}(d\phi) \\ &= [\mathbf{I}_m - \tilde{\gamma}\mathbf{D}\mathbf{A}] \text{vec}(d\mathbf{z}) - \tilde{\gamma}[\mathbf{z}^T \otimes \mathbf{D}] \text{vec}(d\mathbf{A}) - \mathbf{D}\text{vec}(d\phi). \end{aligned}$$

Therefore, the partial derivative of  $f$  with respect to  $\mathbf{z}$ ,  $\mathbf{A}$ , and  $\phi$  are given by

$$\begin{aligned} \frac{\partial f}{\partial \mathbf{z}} &= [\mathbf{I}_m - \tilde{\gamma}\mathbf{D}\mathbf{A}]^T \\ \frac{\partial f}{\partial \mathbf{A}} &= -\tilde{\gamma}[\mathbf{z}^T \otimes \mathbf{D}]^T \\ \frac{\partial f}{\partial \phi} &= -\mathbf{D}^T. \end{aligned}$$

It follows from the definition of the feature vector  $\phi$  in equation 4 that

$$d\phi = \frac{1}{\sqrt{m}} d\sigma(\mathbf{W}\mathbf{x}) = \frac{1}{\sqrt{m}} \mathbf{E}(d\mathbf{W})\mathbf{x} = \frac{1}{\sqrt{m}} [\mathbf{x}^T \otimes \mathbf{E}] \text{vec}(\mathbf{W}).$$

Thus, the partial derivative of  $\phi$  with respect to  $\mathbf{W}$  is given by

$$\frac{\partial \phi}{\partial \mathbf{W}} = \frac{1}{\sqrt{m}} [\mathbf{x}^T \otimes \mathbf{E}]^T. \quad (23)$$

By using the chain rule, we obtain the partial derivative of  $f$  with respect to  $\mathbf{W}$  as follows

$$\frac{\partial f}{\partial \mathbf{W}} = \frac{\partial \phi}{\partial \mathbf{W}} \frac{\partial f}{\partial \phi} = -\frac{1}{\sqrt{m}} [\mathbf{x}^T \otimes \mathbf{E}]^T \mathbf{D}^T.$$

- (ii) Let  $\mathbf{v}$  be an arbitrary vector, and  $\mathbf{u}$  be an arbitrary unit vector. The reverse triangle inequality implies that

$$\begin{aligned} \|(\mathbf{I}_m - \tilde{\gamma} \mathbf{diag}(\sigma'(\mathbf{v}))\mathbf{A})\mathbf{u}\| &\geq \|\mathbf{u}\| - \|\tilde{\gamma} \mathbf{diag}(\sigma'(\mathbf{v}))\mathbf{A}\mathbf{u}\| \\ &\geq \|\mathbf{u}\| - \tilde{\gamma} \|\mathbf{diag}(\sigma'(\mathbf{v}))\| \|\mathbf{A}\| \|\mathbf{u}\| \\ &\stackrel{(a)}{\geq} (1 - \gamma_0) \|\mathbf{u}\| \\ &= 1 - \gamma_0 \\ &> 0, \end{aligned}$$

where (a) is due to  $|\sigma'(v)| \leq 1$  and  $\|\mathbf{A}\|_{\text{op}} \leq c\sqrt{m}$ . Therefore, taking infimum on the left-hand side over all unit vector  $\mathbf{u}$  yields the desired result.

- (iii) Since  $f(\mathbf{z}^*, \mathbf{A}, \mathbf{W}) = 0$ , taking implicit differentiation of  $f$  with respect to  $\mathbf{A}$  at  $\mathbf{z}^*$  gives us

$$\left( \frac{\partial \mathbf{z}}{\partial \mathbf{A}} \Big|_{\mathbf{z}=\mathbf{z}^*} \right) \left( \frac{\partial f}{\partial \mathbf{z}} \Big|_{\mathbf{z}=\mathbf{z}^*} \right) + \left( \frac{\partial f}{\partial \mathbf{A}} \Big|_{\mathbf{z}=\mathbf{z}^*} \right) = 0$$

The results in part (i)-(ii) imply the smallest eigenvalue of  $\frac{\partial f}{\partial \mathbf{z}} \Big|_{\mathbf{z}^*}$  is strictly positive, so that it is invertible. Therefore, we have

$$\frac{\partial \mathbf{z}^*}{\partial \mathbf{A}} = - \left( \frac{\partial f}{\partial \mathbf{A}} \Big|_{\mathbf{z}=\mathbf{z}^*} \right) \left( \frac{\partial f}{\partial \mathbf{z}} \Big|_{\mathbf{z}=\mathbf{z}^*} \right)^{-1} = \tilde{\gamma} [\mathbf{z}^T \otimes \mathbf{D}]^T [\mathbf{I}_m - \tilde{\gamma} \mathbf{D} \mathbf{A}]^{-T} \quad (24)$$

Similarly, we obtain the partial derivative of  $\mathbf{z}^*$  with respect to  $\mathbf{W}$  as follows

$$\frac{\partial \mathbf{z}^*}{\partial \mathbf{W}} = - \left( \frac{\partial f}{\partial \mathbf{W}} \Big|_{\mathbf{z}=\mathbf{z}^*} \right) \left( \frac{\partial f}{\partial \mathbf{z}} \Big|_{\mathbf{z}=\mathbf{z}^*} \right)^{-1} = \frac{1}{\sqrt{m}} [\mathbf{x}^T \otimes \mathbf{E}]^T \mathbf{D}^T [\mathbf{I}_m - \tilde{\gamma} \mathbf{D} \mathbf{A}]^{-T} \quad (25)$$

To further simplify the notation, we denote  $\mathbf{z}$  to be the equilibrium point  $\mathbf{z}^*$  by omitting the superscribe, i.e.,  $\mathbf{z} = \mathbf{z}^*$ . Let  $\hat{y} = \mathbf{u}^T \mathbf{z} + \mathbf{v}^T \phi$  be the prediction for the training data  $(\mathbf{x}, \mathbf{y})$ . The differential of  $\hat{y}$  is given by

$$d\hat{y} = d(\mathbf{u}^T \mathbf{z} + \mathbf{v}^T \phi) = \mathbf{u}^T d\mathbf{z} + \mathbf{z} d\mathbf{u} + \mathbf{v}^T d\phi + \phi^T d\mathbf{v}.$$

The partial derivative of  $\hat{y}$  with respect to  $\mathbf{u}$ ,  $\mathbf{v}$ ,  $\mathbf{z}$ , and  $\phi$  are given by

$$\frac{\partial \hat{y}}{\partial \mathbf{z}} = \mathbf{u}, \quad \frac{\partial \hat{y}}{\partial \mathbf{u}} = \mathbf{z}, \quad \frac{\partial \hat{y}}{\partial \mathbf{v}} = \phi, \quad \frac{\partial \hat{y}}{\partial \phi} = \mathbf{v}, \quad (26)$$

Let  $\ell = \frac{1}{2}(\hat{y} - y)^2$ . Then  $\partial \ell / \partial \hat{y} = (\hat{y} - y)$ . By chain rule, we have

$$\frac{\partial \ell}{\partial \mathbf{u}} = \frac{\partial \hat{y}}{\partial \mathbf{u}} \frac{\partial \ell}{\partial \hat{y}} = \mathbf{z}(\hat{y} - y) \quad (27)$$

$$\frac{\partial \ell}{\partial \phi} = \frac{\partial \hat{y}}{\partial \phi} \frac{\partial \ell}{\partial \hat{y}} = \phi(\hat{y} - y). \quad (28)$$

By using equation 24-equation 25 and chain rule, we obtain

$$\begin{aligned}\frac{\partial \ell}{\partial \mathbf{A}} &= \frac{\partial \mathbf{z}}{\partial \mathbf{A}} \frac{\partial \ell}{\partial \mathbf{z}} \\ &= \frac{\partial \mathbf{z}}{\partial \mathbf{A}} \frac{\partial \hat{y}}{\partial \mathbf{z}} \frac{\partial \ell}{\partial \hat{y}} = \tilde{\gamma}(\hat{y} - y) [\mathbf{z}^T \otimes \mathbf{D}]^T [\mathbf{I}_m - \tilde{\gamma} \mathbf{D} \mathbf{A}]^{-T} \mathbf{u},\end{aligned}\quad (29)$$

and

$$\begin{aligned}\frac{\partial \ell}{\partial \mathbf{W}} &= \frac{\partial \mathbf{z}}{\partial \mathbf{W}} \frac{\partial \hat{y}}{\partial \mathbf{z}} \frac{\partial \ell}{\partial \hat{y}} + \frac{\partial \phi}{\partial \mathbf{W}} \frac{\partial \hat{y}}{\partial \phi} \frac{\partial \ell}{\partial \hat{y}} \\ &= \frac{1}{\sqrt{m}}(\hat{y} - y) [\mathbf{x}^T \otimes \mathbf{E}]^T [\mathbf{D}^T (\mathbf{I}_m - \tilde{\gamma} \mathbf{D} \mathbf{A})^{-T} \mathbf{u} + \mathbf{v}].\end{aligned}\quad (30)$$

Since  $L = \sum_{i=1}^n \ell_i$  with  $\ell_i = \ell(\hat{y}_i, y_i)$ , we have  $dL = \sum_{i=1}^n d\ell_i$  and  $\partial L / \partial \ell_i = 1$ . Therefore, we obtain

$$\frac{\partial L}{\partial \mathbf{A}} = \sum_{i=1}^n \frac{\partial \ell_i}{\partial \mathbf{A}} = \sum_{i=1}^n \tilde{\gamma}(\hat{y}_i - y_i) [\mathbf{z}_i^T \otimes \mathbf{D}_i]^T [\mathbf{I}_m - \tilde{\gamma} \mathbf{D}_i \mathbf{A}]^{-T} \mathbf{u} \quad (31)$$

$$\frac{\partial L}{\partial \mathbf{W}} = \sum_{i=1}^n \frac{\partial \ell_i}{\partial \mathbf{W}} = \sum_{i=1}^n \frac{1}{\sqrt{m}}(\hat{y}_i - y_i) [\mathbf{x}_i^T \otimes \mathbf{E}_i]^T [\mathbf{D}_i^T (\mathbf{I}_m - \tilde{\gamma} \mathbf{D}_i \mathbf{A})^{-T} \mathbf{u} + \mathbf{v}] \quad (32)$$

$$\frac{\partial L}{\partial \mathbf{u}} = \sum_{i=1}^n \frac{\partial \ell_i}{\partial \mathbf{u}} = \sum_{i=1}^n (\hat{y}_i - y_i) \mathbf{z}_i \quad (33)$$

$$\frac{\partial L}{\partial \mathbf{v}} = \sum_{i=1}^n \frac{\partial \ell_i}{\partial \mathbf{v}} = \sum_{i=1}^n (\hat{y}_i - y_i) \phi_i \quad (34)$$

□

### A.3 PROOF OF LEMMA 3.4

*Proof.* Let  $\mathbf{z}_i$  denote the  $i$ -th equilibrium point of  $\mathbf{x}_i$ . By using equation 24, 25, 31 and 32, we obtain the dynamics of the equilibrium point  $\mathbf{z}_i$  as follows

$$\begin{aligned}\frac{d\mathbf{z}_i}{dt} &= \left( \frac{\partial \mathbf{z}_i}{\partial \mathbf{A}} \right)^T \frac{d\text{vec}(\mathbf{A})}{dt} + \left( \frac{\partial \mathbf{z}_i}{\partial \mathbf{W}} \right)^T \frac{d\text{vec}(\mathbf{W})}{dt} \\ &= \left( \frac{\partial \mathbf{z}_i}{\partial \mathbf{A}} \right)^T \left( -\frac{\partial L}{\partial \mathbf{A}} \right) + \left( \frac{\partial \mathbf{z}_i}{\partial \mathbf{W}} \right)^T \left( -\frac{\partial L}{\partial \mathbf{W}} \right) \\ &= -\tilde{\gamma}^2 \sum_{j=1}^n (\hat{y}_j - y_j) [\mathbf{I}_m - \tilde{\gamma} \mathbf{D}_i \mathbf{A}]^{-1} [\mathbf{z}_i^T \otimes \mathbf{D}_i] [\mathbf{z}_j^T \otimes \mathbf{D}_j]^T [\mathbf{I}_m - \tilde{\gamma} \mathbf{D}_j \mathbf{A}]^{-T} \mathbf{u} \\ &\quad - \frac{1}{m} \sum_{j=1}^n (\hat{y}_j - y_j) [\mathbf{I}_m - \tilde{\gamma} \mathbf{D}_i \mathbf{A}]^{-1} \mathbf{D}_i [\mathbf{x}_i^T \otimes \mathbf{E}_i] [\mathbf{x}_j^T \otimes \mathbf{E}_j]^T [\mathbf{D}_j^T (\mathbf{I}_m - \tilde{\gamma} \mathbf{D}_j \mathbf{A})^{-T} \mathbf{u} + \mathbf{v}] \\ &= -\tilde{\gamma}^2 \sum_{j=1}^n (\hat{y}_j - y_j) [\mathbf{I}_m - \tilde{\gamma} \mathbf{D}_i \mathbf{A}]^{-1} \mathbf{D}_i \mathbf{D}_j^T [\mathbf{I}_m - \tilde{\gamma} \mathbf{D}_j \mathbf{A}]^{-T} \mathbf{u} \mathbf{z}_i^T \mathbf{z}_j \\ &\quad - \frac{1}{m} \sum_{j=1}^n (\hat{y}_j - y_j) [\mathbf{I}_m - \tilde{\gamma} \mathbf{D}_i \mathbf{A}]^{-1} \mathbf{D}_i \mathbf{E}_i \mathbf{E}_j^T [\mathbf{D}_j^T (\mathbf{I}_m - \tilde{\gamma} \mathbf{D}_j \mathbf{A})^{-T} \mathbf{u} + \mathbf{v}] \mathbf{x}_i^T \mathbf{x}_j.\end{aligned}$$

By using equation 23 and 32, we obtain the dynamics of the feature vector  $\phi_i$

$$\begin{aligned}\frac{d\phi_i}{dt} &= \left( \frac{\partial \phi_i}{\partial \mathbf{W}} \right)^T \frac{d\text{vec}(\mathbf{W})}{dt} \\ &= \left( \frac{\partial \phi_i}{\partial \mathbf{W}} \right)^T \left( -\frac{\partial L}{\partial \mathbf{W}} \right) \\ &= -\frac{1}{m} \sum_{j=1}^n (\hat{y}_j - y_j) \mathbf{E}_i \mathbf{E}_j^T [\mathbf{D}_j^T (\mathbf{I}_m - \tilde{\gamma} \mathbf{D}_j \mathbf{A})^{-T} \mathbf{u} + \mathbf{v}] \mathbf{x}_i^T \mathbf{x}_j.\end{aligned}$$

By chain rule, the dynamics of the prediction  $\hat{y}_i$  is given by

$$\begin{aligned}\frac{d\hat{y}_i}{dt} &= \left( \frac{\partial \hat{y}_i}{\partial \mathbf{z}_i} \right)^T \frac{d\mathbf{z}_i}{dt} + \left( \frac{\partial \hat{y}_i}{\partial \phi_i} \right)^T \frac{d\phi_i}{dt} + \left( \frac{\partial \hat{y}_i}{\partial \mathbf{u}} \right)^T \frac{d\mathbf{u}}{dt} + \left( \frac{\partial \hat{y}_i}{\partial \mathbf{v}} \right)^T \frac{d\mathbf{v}}{dt} \\ &= -\tilde{\gamma}^2 \sum_{j=1}^n (\hat{y}_j - y_j) [\mathbf{u}^T (\mathbf{I}_m - \tilde{\gamma} \mathbf{D}_i \mathbf{A})^{-1} \mathbf{D}_i \mathbf{D}_j^T (\mathbf{I}_m - \tilde{\gamma} \mathbf{D}_j \mathbf{A})^{-T} \mathbf{u}] (\mathbf{z}_i^T \mathbf{z}_j) \\ &\quad - \frac{1}{m} \sum_{j=1}^n (\hat{y}_j - y_j) \left[ (\mathbf{D}_i^T (\mathbf{I}_m - \tilde{\gamma} \mathbf{D}_i \mathbf{A})^{-1} \mathbf{u} + \mathbf{v})^T \mathbf{E}_i \mathbf{E}_j^T (\mathbf{D}_j^T (\mathbf{I}_m - \tilde{\gamma} \mathbf{D}_j \mathbf{A})^{-T} \mathbf{u} + \mathbf{v}) \right] (\mathbf{x}_i^T \mathbf{x}_j) \\ &\quad - \sum_{j=1}^n (\hat{y}_j - y_j) (\mathbf{z}_i^T \mathbf{z}_j) \\ &\quad - \sum_{j=1}^n (\hat{y}_j - y_j) (\phi_i^T \phi_j).\end{aligned}$$

Define the matrices  $\mathbf{M}(t) \in \mathbb{R}^{n \times n}$  and  $\mathbf{Q}(t) \in \mathbb{R}^{n \times n}$  as follows

$$\begin{aligned}\mathbf{M}(t)_{ij} &\triangleq \frac{1}{m} \mathbf{u}^T (\mathbf{I}_m - \tilde{\gamma} \mathbf{D}_i \mathbf{A})^{-1} \mathbf{D}_i \mathbf{D}_j^T (\mathbf{I}_m - \tilde{\gamma} \mathbf{D}_j \mathbf{A})^{-T} \mathbf{u}, \\ \mathbf{Q}(t)_{ij} &\triangleq \frac{1}{m} (\mathbf{D}_i^T (\mathbf{I}_m - \tilde{\gamma} \mathbf{D}_i \mathbf{A})^{-1} \mathbf{u} + \mathbf{v})^T \mathbf{E}_i \mathbf{E}_j^T (\mathbf{D}_j^T (\mathbf{I}_m - \tilde{\gamma} \mathbf{D}_j \mathbf{A})^{-T} \mathbf{u} + \mathbf{v}).\end{aligned}$$

Let  $\mathbf{X} \in \mathbb{R}^{n \times d}$ ,  $\Phi(t) \in \mathbb{R}^{n \times m}$ , and  $\mathbf{Z}(t) \in \mathbb{R}^{n \times m}$  be the matrices whose rows are the training data  $\mathbf{x}_i$ , feature vectors  $\phi_i$ , and equilibrium points  $\mathbf{z}_i$  at time  $t$ , respectively. The dynamics of the prediction vector  $\hat{\mathbf{y}}$  is given by

$$\frac{d\hat{\mathbf{y}}}{dt} = -[(\gamma^2 \mathbf{M}(t) + \mathbf{I}_n) \circ \mathbf{Z}(t) \mathbf{Z}(t)^T + \mathbf{Q}(t) \circ \mathbf{X} \mathbf{X}^T + \Phi(t) \Phi(t)^T] (\hat{\mathbf{y}}(t) - \mathbf{y}).$$

□

#### A.4 PROOF OF LEMMA 3.5

##### A.4.1 REVIEW OF HERMITE EXPANSIONS

To make the paper self-contained, we review the necessary background about the Hermite polynomials in this section. One can find each result in this section from any standard textbooks about functional analysis such as MacCluer (2008); Kreyszig (1978), or most recent literature (Nguyen & Mondelli, 2020, Appendix D) and (Oymak & Soltanolkotabi, 2020, Appendix H).

We consider an  $L^2$ -space defined by  $L^2(\mathbb{R}, dP)$ , where  $dP$  is the *Gaussian measure*, that is,

$$dP = p(x)dx, \quad \text{where } p(x) = \frac{1}{\sqrt{2\pi}} e^{-\frac{x^2}{2}}.$$

Thus,  $L^2(\mathbb{R}, dP)$  is a collection of functions  $f$  for which

$$\int_{-\infty}^{\infty} |f(x)|^2 dP(x) = \int_{-\infty}^{\infty} |f(x)|^2 p(x)dx = \mathbb{E}_{x \sim N(0,1)} |f(x)|^2 < \infty.$$

**Lemma A.1.** The relu activation  $\sigma \in L^2(\mathbb{R}, dP)$ .

*Proof.* Note that

$$\int_{-\infty}^{\infty} |\sigma(x)|^2 p(x) dx \leq \int_{-\infty}^{\infty} |x|^2 p(x) dx = \mathbb{E}_{x \sim N(0,1)} |x|^2 = \text{Var}(x) = 1.$$

□

For any functions  $f, g \in L^2(\mathbb{R}, dP)$ , we define an *inner product*

$$\langle f, g \rangle := \int_{-\infty}^{\infty} f(x)g(x)dP(x) = \int_{-\infty}^{\infty} f(x)g(x)p(x)dx = \mathbb{E}_{x \sim N(0,1)} [f(x)g(x)].$$

Furthermore, the induced norm  $\|\cdot\|$  is given by

$$\|f\|^2 = \langle f, f \rangle = \int_{-\infty}^{\infty} |f(x)|^2 dP(x) = \mathbb{E}_{x \sim N(0,1)} |f(x)|^2.$$

This  $L^2$  space has an orthonormal basis with respect to the inner product defined above, called *normalized probabilist's Hermite polynomials*  $\{h_n(x)\}_{n=0}^{\infty}$  that are given by

$$h_n(x) = \frac{1}{\sqrt{n!}} (-1)^n e^{x^2/2} D^n(e^{-x^2/2}), \quad \text{where} \quad D^n(e^{-x^2/2}) = \frac{d^n}{dx^n} e^{-x^2/2}.$$

**Lemma A.2.** The *normalized probabilist's Hermite polynomials* is an orthonormal basis of  $L^2(\mathbb{R}, dP)$ :  $\langle h_m, h_n \rangle = \delta_{mn}$ .

*Proof.* Note that  $D^n(e^{-x^2/2}) = e^{-x^2/2} P_n(x)$  for a polynomial with degree of  $n$  and leading term is  $(-1)^n x^n$ . Thus, we can consider  $h_n(x) = \frac{1}{\sqrt{n!}} (-1)^n P_n(x)$ .

Assume  $m < n$

$$\begin{aligned} \langle h_n, h_m \rangle &= \mathbb{E}_{x \sim N(0,1)} [h_n(x)h_m(x)] \\ &= \int_{-\infty}^{\infty} h_n(x)h_m(x) \frac{1}{\sqrt{2\pi}} e^{-x^2/2} dx, \\ &= \frac{1}{\sqrt{2\pi}\sqrt{n!}} (-1)^n \int_{-\infty}^{\infty} D^n(e^{-x^2/2}) h_m(x) dx, \quad \text{rewrite } h_n(x) \text{ by its definition} \\ &= \frac{1}{\sqrt{2\pi}\sqrt{n!}\sqrt{m!}} (-1)^{n+m} \int_{-\infty}^{\infty} D^n(e^{-x^2/2}) P_m(x) dx, \quad \text{rewrite } h_m \text{ by the polynomial form} \\ &= \frac{1}{\sqrt{2\pi}\sqrt{n!}\sqrt{m!}} (-1)^{2n+m} \int_{-\infty}^{\infty} e^{-x^2/2} D_n[P_m(x)] dx, \quad \text{integration by parts } n \text{ times} \end{aligned}$$

There is no boundary terms because the super exponential decay of  $e^{-x^2/2}$  at infinity. Since  $m < n$ , then  $D_n(P_m) = 0$  so that  $\langle h_m, h_n \rangle = 0$ . If  $m = n$ , then  $D_n(P_m) = (-1)^n n!$ . Thus,  $\langle h_n, h_n \rangle = 1$ . □

**Remark:** Since  $\{h_n\}$  is an orthonormal basis, for every  $f \in L^2(\mathbb{R}, dP)$ , we have

$$f(x) = \sum_{n=0}^{\infty} \langle f, h_n \rangle h_n(x)$$

in the sense that

$$\lim_{N \rightarrow \infty} \left\| f(x) - \sum_{n=0}^N \langle f, h_n \rangle h_n(x) \right\|^2 = \lim_{N \rightarrow \infty} \mathbb{E}_{x \sim N(0,1)} \left| f(x) - \sum_{n=0}^N \langle f, h_n \rangle h_n(x) \right|^2 = 0$$

**Lemma A.3.**  $f \in L^2(\mathbb{R}, dP)$  if and only if  $\sum_{n=0}^{\infty} |\langle f, h_n \rangle|^2 < \infty$ .

*Proof.* Note that

$$\begin{aligned}
\langle f, f \rangle &= \int_{-\infty}^{\infty} |f(x)|^2 dP(x) \\
&= \int_{-\infty}^{\infty} \left( \sum_{i=0}^{\infty} \langle f, h_i \rangle h_i(x) \right) \left( \sum_{j=0}^{\infty} \langle f, h_j \rangle h_j(x) \right) dP(x) \\
&= \sum_{i,j=0}^{\infty} \langle f, h_i \rangle \langle f, h_j \rangle \int_{-\infty}^{\infty} h_i(x) h_j(x) dP(x) \\
&= \sum_{i=1}^{\infty} |\langle f, h_i \rangle|^2.
\end{aligned}$$

□

**Lemma A.4.** Consider a Hilbert space  $H$  with inner product  $\langle \cdot, \cdot \rangle$ . If  $\|f_n - f\| \rightarrow 0$  and  $\|g_n - g\| \rightarrow 0$ , then  $\langle f, g \rangle = \lim_{n \rightarrow \infty} \langle f_n, g_n \rangle$ .

*Proof.* Observe that

$$\begin{aligned}
|\langle f, g \rangle - \langle f_n, g_n \rangle| &\leq |\langle f, g \rangle - \langle f_n, g \rangle| + |\langle f_n, g \rangle - \langle f_n, g_n \rangle| \\
&\leq \|f\| \|g - g_n\| + \|f_n\| \|g - g_n\|.
\end{aligned}$$

Let  $n \rightarrow \infty$ , then the continuity of  $\|\cdot\|$  implies the desired result. □

**Lemma A.5.** Let  $\{h_n(x)\}$  be the normalized probabilist's Hermite polynomials. For any fixed number  $t$ , we have

$$e^{xt-t^2/2} = \sum_{n=0}^{\infty} \frac{t^n}{\sqrt{n!}} h_n(x). \quad (35)$$

*Proof.* First show  $f(x) = e^{xt-t^2/2} \in H \triangleq L^2(\mathbb{R}, dP)$ .

$$\begin{aligned}
\langle f, f \rangle &= \mathbb{E}_{x \sim N(0,1)} |f(x)|^2 \\
&= \int_{-\infty}^{\infty} e^{2xt-t^2} \frac{1}{\sqrt{2\pi}} e^{-x^2/2} dx \\
&= e^{t^2} \int_{-\infty}^{\infty} \frac{1}{\sqrt{2\pi}} \exp \left\{ -\frac{(x-2t)^2}{2} \right\} dx, \quad x \sim N(2t, 1) \\
&= e^{t^2} < \infty.
\end{aligned}$$

Thus  $f(x) \in H$ . Then  $f(x) = \sum_{n=0}^{\infty} \langle f, h_n \rangle h_n(x)$ . Note that

$$\begin{aligned}
\langle f, h_n \rangle &= \mathbb{E}_{x \sim N(0,1)} [f(x) h_n(x)] \\
&= \int_{-\infty}^{\infty} e^{xt-t^2/2} \cdot \frac{1}{\sqrt{n!}} (-1)^n e^{x^2/2} D_n(e^{-x^2/2}) \cdot \frac{1}{\sqrt{2\pi}} e^{-x^2/2} dx \\
&= \frac{1}{\sqrt{n!}} (-1)^n \frac{1}{\sqrt{2\pi}} \int_{-\infty}^{\infty} e^{xt-t^2/2} \cdot D_n(e^{-x^2/2}) dx, \quad \text{integration by parts } n \text{ times} \\
&= \frac{1}{\sqrt{n!}} (-1)^{2n} \frac{1}{\sqrt{2\pi}} \int_{-\infty}^{\infty} e^{xt-t^2/2} t^n \cdot e^{-x^2/2} dx \\
&= \frac{t^n}{\sqrt{n!}} \int_{-\infty}^{\infty} \frac{1}{\sqrt{2\pi}} e^{-(x-t)^2/2} dx, \quad x \sim N(t, 1) \\
&= \frac{t^n}{\sqrt{n!}}
\end{aligned}$$

□

**Lemma A.6.** Let  $\mathbf{a}, \mathbf{b} \in \mathbb{R}^d$  with  $\|\mathbf{a}\| = \|\mathbf{b}\| = 1$ , then

$$\mathbb{E}_{\mathbf{w} \sim N(\mathbf{0}, \mathbf{I}_d)}[h_n(\langle \mathbf{a}, \mathbf{w} \rangle) h_m(\langle \mathbf{b}, \mathbf{w} \rangle)] = \langle \mathbf{a}, \mathbf{b} \rangle^n \delta_{mn}.$$

*Proof.* Given fixed numbers  $s$  and  $t$ , we define two functions  $f(\mathbf{w}) = e^{\langle \mathbf{a}, \mathbf{w} \rangle t - t^2/2}$  and  $g(\mathbf{w}) = e^{\langle \mathbf{b}, \mathbf{w} \rangle s - s^2/2}$ . Let  $x = \langle \mathbf{a}, \mathbf{w} \rangle$  and  $y = \langle \mathbf{b}, \mathbf{w} \rangle$ . Then we have

$$\begin{aligned} f(\mathbf{w}) &= e^{\langle \mathbf{a}, \mathbf{w} \rangle t - t^2/2} = e^{xt - t^2/2} = \sum_{n=0}^{\infty} \frac{t^n}{\sqrt{n!}} h_n(x) = \sum_{n=0}^{\infty} \frac{t^n}{\sqrt{n!}} h_n(\langle \mathbf{a}, \mathbf{w} \rangle), \\ g(\mathbf{w}) &= e^{\langle \mathbf{b}, \mathbf{w} \rangle s - s^2/2} = e^{ys - s^2/2} = \sum_{n=0}^{\infty} \frac{s^n}{\sqrt{n!}} h_n(y) = \sum_{n=0}^{\infty} \frac{s^n}{\sqrt{n!}} h_n(\langle \mathbf{b}, \mathbf{w} \rangle). \end{aligned}$$

Define a Hilbert space  $H_d = L^2(\mathbb{R}^d, dP)$ , where  $dP$  is the *multivariate Gaussian measure*, equipped with inner product  $\langle f, g \rangle \triangleq \mathbb{E}_{\mathbf{w} \sim N(\mathbf{0}, \mathbf{I}_d)}[f(\mathbf{w})g(\mathbf{w})]$ . Clearly,  $f, g \in H_d$ . Define sequences  $\{f_N\}$  and  $\{g_N\}$  as follows

$$f_N(\mathbf{w}) = \sum_{n=0}^N \frac{t^n}{\sqrt{n!}} h_n(\langle \mathbf{a}, \mathbf{w} \rangle) \quad \text{and} \quad g_N(\mathbf{w}) = \sum_{n=0}^N \frac{s^n}{\sqrt{n!}} h_n(\langle \mathbf{b}, \mathbf{w} \rangle).$$

Since  $\|f - f_N\| \rightarrow 0$  and  $\|g - g_N\| \rightarrow 0$ , we have

$$\begin{aligned} \mathbb{E}_{\mathbf{w} \sim N(\mathbf{0}, \mathbf{I}_d)}[f(\mathbf{w})g(\mathbf{w})] &= \langle f, g \rangle \\ &= \lim_{N \rightarrow \infty} \langle f_N, g_N \rangle \\ &= \lim_{N \rightarrow \infty} \mathbb{E}_{\mathbf{w} \sim N(\mathbf{0}, \mathbf{I}_d)}[f_N(\mathbf{w})g_N(\mathbf{w})] \\ &= \lim_{N \rightarrow \infty} \sum_{n,m=0}^N \frac{t^n s^m}{\sqrt{n!} \sqrt{m!}} \mathbb{E}_{\mathbf{w} \sim N(\mathbf{0}, \mathbf{I}_d)}[h_n(\langle \mathbf{a}, \mathbf{w} \rangle) h_m(\langle \mathbf{b}, \mathbf{w} \rangle)] \end{aligned}$$

Note that the LHS is also given by

$$\begin{aligned} \mathbb{E}_{\mathbf{w} \sim N(\mathbf{0}, \mathbf{I}_d)}[f(\mathbf{w})g(\mathbf{w})] &= e^{-t^2/2 - s^2/2} \mathbb{E}_{\mathbf{w} \sim N(\mathbf{0}, \mathbf{I}_d)}[e^{\langle \mathbf{a}, \mathbf{w} \rangle t + \langle \mathbf{b}, \mathbf{w} \rangle s}] \\ &= e^{-t^2/2 - s^2/2} \mathbb{E}_{\mathbf{w} \sim N(\mathbf{0}, \mathbf{I}_d)}[e^{\sum_{i=1}^d \mathbf{w}_i (a_i t + b_i s)}] \\ &= e^{-t^2/2 - s^2/2} \prod_{i=1}^d \mathbb{E}_{w_i \sim N(0,1)}[e^{w_i (a_i t + b_i s)}] \\ &= e^{-t^2/2 - s^2/2} \prod_{i=1}^d M_{w_i}(a_i t + b_i s) \\ &= e^{\langle \mathbf{a}, \mathbf{b} \rangle st} \\ &= \sum_{n=0}^{\infty} \frac{\langle \mathbf{a}, \mathbf{b} \rangle^n (st)^n}{n!}. \end{aligned}$$

Since  $s$  and  $t$  are arbitrary numbers, matching the coefficients yields

$$\mathbb{E}_{\mathbf{w} \sim N(\mathbf{0}, \mathbf{I}_d)}[h_n(\langle \mathbf{a}, \mathbf{w} \rangle) h_m(\langle \mathbf{b}, \mathbf{w} \rangle)] = \langle \mathbf{a}, \mathbf{b} \rangle^n \delta_{mn}.$$

□

A.4.2 LOWER BOUND THE SMALLEST EIGENVALUES OF  $\mathbf{G}^\infty$ 

The result in this subsection is similar to the results in (Nguyen & Mondelli, 2020, Appendix D) and (Oymak & Soltanolkotabi, 2020, Appendix H). The key difference is the assumptions made on the training data. In particular, Oymak & Soltanolkotabi (2020) assumes the training data is  $\delta$ -separable, i.e.,  $\min\{\|\mathbf{x}_i - \mathbf{x}_j\|, \|\mathbf{x}_i + \mathbf{x}_j\|\} \geq \delta > 0$  for all  $i \neq j$ , and Nguyen & Mondelli (2020) assumes the data  $\mathbf{x}_i$  follows some sub-Gaussian random variable, while we assume no two data are parallel to each other, i.e.,  $\mathbf{x}_i \nparallel \mathbf{x}_j$  for all  $i \neq j$ .

**Lemma A.7.** Given an activation function  $\sigma$ , if  $\sigma \in L^2(\mathbb{R}, dP)$  and  $\|\mathbf{x}_i\| = 1$  for all  $i \in [n]$ , then

$$\mathbf{G}^\infty = \sum_{k=0}^{\infty} |\langle \sigma, h_k \rangle|^2 \underbrace{(\mathbf{X} \mathbf{X}^T \circ \cdots \circ \mathbf{X} \mathbf{X}^T)}_{k \text{ times}} \quad (36)$$

where  $\circ$  is elementwise product.

*Proof.* Observe

$$\begin{aligned} \mathbf{G}_{ij}^\infty &= \mathbb{E}_{\mathbf{w} \sim N(0, \mathbf{I}_d)} [\sigma(\langle \mathbf{w}, \mathbf{x}_i \rangle) \sigma(\langle \mathbf{w}, \mathbf{x}_j \rangle)] \\ &= \sum_{k, \ell=0}^{\infty} \langle \sigma, h_k \rangle \langle \sigma, h_\ell \rangle \mathbb{E}_{\mathbf{w} \sim N(0, \mathbf{I}_d)} [h_k(\langle \mathbf{w}, \mathbf{x}_i \rangle) h_\ell(\langle \mathbf{w}, \mathbf{x}_j \rangle)] \\ &= \sum_{k, \ell=0}^{\infty} \langle \sigma, h_k \rangle \langle \sigma, h_\ell \rangle \cdot \langle \mathbf{x}_i, \mathbf{x}_j \rangle^k \delta_{k\ell} \\ &= \sum_{k=0}^{\infty} \langle \sigma, h_k \rangle^2 \langle \mathbf{x}_i, \mathbf{x}_j \rangle^k \end{aligned}$$

□

Note that the tensor product of  $\mathbf{x}_i$  and  $\mathbf{x}_i$  is  $\mathbf{x}_i \otimes \mathbf{x}_i \in \mathbb{R}^{d^2 \times 1}$ , so that

$$\langle \mathbf{x}_i, \mathbf{x}_j \rangle^k = \left\langle \underbrace{\mathbf{x}_i \otimes \cdots \otimes \mathbf{x}_i}_{k \text{ times}}, \underbrace{\mathbf{x}_j \otimes \cdots \otimes \mathbf{x}_j}_{k \text{ times}} \right\rangle$$

Here we introduce the (row-wise) *Khatri-Rao product* of two matrices  $\mathbf{A} \in \mathbb{R}^{k \times m}$ ,  $\mathbf{B} \in \mathbb{R}^{k \times n}$ . Then

$$\mathbf{A} * \mathbf{B} = \begin{bmatrix} \mathbf{A}_{1*} \otimes \mathbf{B}_{1*} \\ \vdots \\ \mathbf{A}_{k*} \otimes \mathbf{B}_{k*} \end{bmatrix} \in \mathbb{R}^{k \times mn}$$

where  $\mathbf{A}_{i*}$  indicates the  $i$ -th row of matrix  $\mathbf{A}$ . Therefore, the  $i$ -th row of  $\mathbf{X} * \cdots * \mathbf{X} \triangleq \mathbf{X}^{*n}$  is  $\mathbf{x}_i \otimes \cdots \otimes \mathbf{x}_i$ . As a result, we obtain a more compact form of equation 36 as follows

$$\mathbf{G}^\infty = \sum_{k=0}^{\infty} |\langle \sigma, h_k \rangle|^2 (\mathbf{X}^{*k}) (\mathbf{X}^{*k})^T. \quad (37)$$

**Lemma A.8.** If  $\sigma(x)$  is a nonlinear function and  $|\sigma(x)| \leq |x|$  and , then

$$\sup\{n : \langle \sigma, h_n \rangle > 0\} = \infty.$$

*Proof.* It is equivalent to show  $\sigma(x)$  is not a finite linear combination of polynomials. We prove by contradiction. Suppose  $\sigma(x) = a_0 + a_1 x + \cdots + a_n x^n$ . Since  $\sigma(0) = 0 = a_0$ , then  $\sigma(x) = a_1 x + \cdots + a_n x^n$ . Observe that

$$\begin{aligned} \lim_{x \rightarrow \infty} \frac{|\sigma(x)|}{|x|} &= \lim_{x \rightarrow \infty} \frac{|a_1 x + \cdots + a_n x^n|}{|x|} \\ &= \lim_{x \rightarrow \infty} |a_1 + \cdots + a_n x^{n-1}|, \\ &= \infty \end{aligned}$$

which contradicts  $\frac{|\sigma(x)|}{|x|} \leq 1$  for all  $x \neq 0$ . □



**Lemma A.9.** If  $\mathbf{x}_i \not\parallel \mathbf{x}_j$  for all  $i \neq j$ , then there exists  $k_0 > 0$  such that  $\lambda_{\min} [(\mathbf{X}^{*k})(\mathbf{X}^{*k})^T] > 0$  for all  $k \geq k_0$ . Therefore,  $\lambda_{\min}(\mathbf{G}^\infty) > 0$ .

*Proof.* To simplify the notation, denote  $\mathbf{K} = (\mathbf{X}^{*k})^T \in \mathbb{R}^{kd \times n}$ . Since  $\mathbf{x}_i \not\parallel \mathbf{x}_j$  and  $\|\mathbf{x}_i\| = 1$ , then let  $\delta \triangleq \max\{|\langle \mathbf{x}_i, \mathbf{x}_j \rangle|\} = \max\{|\cos \theta_{ij}|\}$  and  $\delta \in (0, 1)$ , where  $\theta_{ij}$  is the angle between  $\mathbf{x}_i$  and  $\mathbf{x}_j$ . For any unit vector  $\mathbf{v} \in \mathbb{R}^n$ , we have

$$\begin{aligned}
\mathbf{v}^T (\mathbf{X}^{*k})(\mathbf{X}^{*k})^T \mathbf{v} &= \|\mathbf{K}\mathbf{v}\|^2 \\
&= \left\| \sum_{i=1}^n v_i \mathbf{K}_{*i} \right\|^2 \\
&= \sum_{i=1}^n \sum_{j=1}^n v_i v_j \langle \mathbf{K}_{*i}, \mathbf{K}_{*j} \rangle \\
&= \sum_{i=1}^n \sum_{j=1}^n v_i v_j \langle \mathbf{x}_i, \mathbf{x}_j \rangle^k \\
&= \sum_{i=1}^n v_i^2 \|\mathbf{x}_i\|^{2k} + \sum_{i \neq j} v_i v_j \langle \mathbf{x}_i, \mathbf{x}_j \rangle^k \\
&= 1 + \sum_{i \neq j} v_i v_j \langle \mathbf{x}_i, \mathbf{x}_j \rangle^k,
\end{aligned}$$

where the last equality is because  $\|\mathbf{x}_i\| = 1$  and  $\|\mathbf{v}\| = 1$ . Note that

$$\begin{aligned}
\left| \sum_{i \neq j} v_i v_j \langle \mathbf{x}_i, \mathbf{x}_j \rangle^k \right| &\leq \sum_{i \neq j} |v_i| |v_j| |\langle \mathbf{x}_i, \mathbf{x}_j \rangle|^k \\
&\leq \delta^k \sum_{i \neq j} |v_i| |v_j|, \quad \text{by } |\langle \mathbf{x}_i, \mathbf{x}_j \rangle| \leq \delta \\
&\leq \delta^k \left( \sum_{i=1}^n |v_i| \right)^2 \\
&\leq n \delta^k, \quad \text{by Cauchy-Schwarz inequality.}
\end{aligned}$$

By inverse triangle inequality, we have

$$\|\mathbf{K}\mathbf{v}\|^2 \geq 1 - n \delta^k.$$

Choose  $k_0 \geq \log n / \log(1/\delta)$ , then  $\lambda_{\min}\{(\mathbf{X}^{*k})(\mathbf{X}^{*k})^T\} > 0$  for all  $k \geq k_0$ .  $\square$

## A.5 PROOF OF LEMMA 3.6

*Proof.* By using the concentration inequality for standard Gaussian random variables, we have

$$\begin{aligned}
\mathbb{P}\left\{\|\mathbf{G}(0) - \mathbf{G}^\infty\|_2 \geq \frac{\lambda_0}{4}\right\} &\leq \mathbb{P}\left\{\|\mathbf{G}(0) - \mathbf{G}^\infty\|_F \geq \frac{\lambda_0}{4}\right\} \\
&= \mathbb{P}\left\{\|\mathbf{G}(0) - \mathbf{G}^\infty\|_F^2 \geq \left(\frac{\lambda_0}{4}\right)^2\right\} \\
&= \mathbb{P}\left\{\sum_{i,j=1}^n |\mathbf{G}_{ij}(0) - \mathbf{G}_{ij}^\infty|^2 \geq \left(\frac{\lambda_0}{4}\right)^2\right\} \\
&\leq \sum_{i,j=1}^n \mathbb{P}\left\{|\mathbf{G}_{ij}(0) - \mathbf{G}_{ij}^\infty|^2 \geq \left(\frac{\lambda_0}{4n}\right)^2\right\} \\
&= \sum_{i,j=1}^n \mathbb{P}\left\{|\mathbf{G}_{ij}(0) - \mathbf{G}_{ij}^\infty| \geq \frac{\lambda_0}{4n}\right\} \\
&\leq n^2 2 \exp\left\{-\frac{2m(\lambda_0/4n)^2}{2^2}\right\} \\
&\leq \delta,
\end{aligned}$$

where we use the fact  $\|\mathbf{X}\|_2 \leq \|\mathbf{X}\|_F$ , and  $\mathbb{P}\{\sum_{i=1}^n x_i \geq \varepsilon\} \leq \sum_{i=1}^n \mathbb{P}\{x_i \geq \varepsilon/n\}$ .  $\square$

## A.6 PROOF OF LEMMA 3.7

*Proof.* By using the 1-Lipschitz continuity of  $\sigma(x)$ , we have

$$\begin{aligned}
\|\mathbf{G} - \mathbf{G}(0)\| &= \frac{1}{m} \|\sigma(\mathbf{X}\mathbf{W}^T)\sigma(\mathbf{X}\mathbf{W}^T)^T - \sigma(\mathbf{X}\mathbf{W}(0)^T)\sigma(\mathbf{X}\mathbf{W}(0)^T)^T\| \\
&\leq \frac{1}{m} \|\sigma(\mathbf{X}\mathbf{W}^T)\sigma(\mathbf{X}\mathbf{W}^T)^T - \sigma(\mathbf{X}\mathbf{W}^T)\sigma(\mathbf{X}\mathbf{W}(0)^T)^T\| \\
&\quad + \frac{1}{m} \|\sigma(\mathbf{X}\mathbf{W}^T)\sigma(\mathbf{X}\mathbf{W}(0)^T)^T - \sigma(\mathbf{X}\mathbf{W}(0)^T)\sigma(\mathbf{X}\mathbf{W}(0)^T)^T\| \\
&= \frac{1}{m} \|\sigma(\mathbf{X}\mathbf{W}^T)\| \|\sigma(\mathbf{X}\mathbf{W}^T) - \sigma(\mathbf{X}\mathbf{W}(0)^T)\| \\
&\quad + \frac{1}{m} \|\sigma(\mathbf{X}\mathbf{W}^T) - \sigma(\mathbf{X}\mathbf{W}(0)^T)\| \|\sigma(\mathbf{X}\mathbf{W}(0)^T)\| \\
&\leq \frac{1}{m} \|\mathbf{X}\| \|\mathbf{W}\| \|\mathbf{X}\| \|\mathbf{W} - \mathbf{W}(0)\| + \frac{1}{m} \|\mathbf{X}\| \|\mathbf{W} - \mathbf{W}(0)\| \|\mathbf{X}\| \|\mathbf{W}(0)\| \\
&\leq \frac{4c}{\sqrt{m}} \|\mathbf{X}\|^2 \|\mathbf{W} - \mathbf{W}(0)\| \\
&\leq \frac{\lambda_0}{4}.
\end{aligned}$$

$\square$

## A.7 PROOF OF LEMMA 3.8

*Proof.* It suffices to show the result hold for  $\gamma = \min\{\gamma_0, \gamma_0/2c\}$ , where  $\gamma_0 = 1/2$ . We prove by the induction. Suppose that for  $0 \leq s \leq t$ , the followings hold

- (i)  $\lambda_{\min}(\mathbf{G}(s)) \geq \frac{\lambda_0}{2}$ ,
- (ii)  $\|\mathbf{u}(s)\| \leq \frac{16c\sqrt{n}}{\lambda_0} \|\hat{\mathbf{y}}(0) - \mathbf{y}\|$ ,
- (iii)  $\|\mathbf{v}(s)\| \leq \frac{8c\sqrt{n}}{\lambda_0} \|\hat{\mathbf{y}}(0) - \mathbf{y}\|$ ,

- (iv)  $\|\mathbf{W}(s)\| \leq 2c\sqrt{m}$ ,
- (v)  $\|\mathbf{A}(s)\| \leq 2c\sqrt{m}$ ,
- (vi)  $\|\hat{\mathbf{y}}(s) - \mathbf{y}\|^2 \leq \exp\{-\lambda_0 s\} \|\hat{\mathbf{y}}(0) - \mathbf{y}\|^2$ ,

Since  $\lambda_{\min}(\mathbf{G}(s)) \geq \frac{\lambda_0}{2}$ , we have

$$\begin{aligned} \frac{d}{dt} \|\hat{\mathbf{y}}(t) - \mathbf{y}\|^2 &= -2(\hat{\mathbf{y}}(t) - \mathbf{y})^T \mathbf{H}(t)(\hat{\mathbf{y}}(t) - \mathbf{y}) \\ &\leq -\lambda_0 \|\hat{\mathbf{y}}(t) - \mathbf{y}\|^2 \end{aligned}$$

Solving the ordinary differential equation yields

$$\|\hat{\mathbf{y}}(t) - \mathbf{y}\|^2 \leq \exp\{-\lambda_0 t\} \|\hat{\mathbf{y}}(0) - \mathbf{y}\|^2.$$

By using the inductive hypothesis  $\|\mathbf{W}(s)\| \leq 2c\sqrt{m}$ , we have

$$\|\phi_i(s)\| = \left\| \frac{1}{\sqrt{m}} \sigma(\mathbf{W}(s)\mathbf{x}_i) \right\| \leq \frac{1}{\sqrt{m}} \|\mathbf{W}(s)\| \|\mathbf{x}_i\| \leq 2c.$$

It follows from Lemma 3.2 with  $\gamma_0 = 1/2$  that

$$\|\mathbf{z}_i^*(s)\| \leq 2\|\phi_i(s)\| \leq 4c.$$

Note that

$$\begin{aligned} \|\nabla_{\mathbf{v}} L(s)\| &\leq \sum_{i=1}^n |\hat{y}_i(s) - y_i| \|\phi_i(s)\| \\ &\leq 2c \sum_{i=1}^n |\hat{y}_i(s) - y_i| \\ &\leq 2c\sqrt{n} \|\hat{\mathbf{y}}(s) - \mathbf{y}\| \\ &\leq 2c\sqrt{n} \exp\{-\lambda_0 s/2\} \|\mathbf{y}(0) - \mathbf{y}\| \end{aligned}$$

and so

$$\begin{aligned} \|\mathbf{v}(t) - \mathbf{v}(0)\| &\leq \int_0^t \|\nabla_{\mathbf{v}} L(s)\| ds \\ &\leq 2c\sqrt{n} \|\mathbf{y}(0) - \mathbf{y}\| \int_0^t \exp\{-\lambda_0 s/2\} ds \\ &\leq \frac{4c\sqrt{n}}{\lambda_0} \|\hat{\mathbf{y}}(0) - \mathbf{y}\|. \end{aligned}$$

Since  $\mathbf{v}_i(0)$  follows symmetric Bernoulli distribution with  $\pm 1/\sqrt{m}$ , then  $\|\mathbf{v}(0)\|^2 = 1$  and we obtain

$$\|\mathbf{v}(t)\| \leq \|\mathbf{v}(t) - \mathbf{v}(0)\| + \|\mathbf{v}(0)\| \leq \frac{8c\sqrt{n}}{\lambda_0} \|\hat{\mathbf{y}}(0) - \mathbf{y}\|.$$

Note that

$$\begin{aligned} \|\nabla_{\mathbf{u}} L(s)\| &\leq \sum_{i=1}^n |\hat{y}_i(s) - y_i| \|\mathbf{z}_i^*\| \\ &\leq 4c\sqrt{n} \|\hat{\mathbf{y}}(s) - \mathbf{y}\| \\ &\leq 4c\sqrt{n} \exp\{-\lambda_0 s/2\} \|\hat{\mathbf{y}}(0) - \mathbf{y}\| \end{aligned}$$

so that

$$\|\mathbf{u}(t) - \mathbf{u}(0)\| \leq \int_0^t \|\nabla_{\mathbf{u}} L(s)\| ds \leq \frac{8c\sqrt{n}}{\lambda_0}$$

Since  $\mathbf{u}_i(0)$  follows symmetric Bernoulli distribution with  $\pm 1/\sqrt{m}$ , then  $\|\mathbf{u}(0)\|^2 = 1$  and we obtain

$$\|\mathbf{u}(t)\| \leq \|\mathbf{u}(t) - \mathbf{u}(0)\| + \|\mathbf{u}(0)\| \leq \frac{16c\sqrt{n}}{\lambda_0} \|\hat{\mathbf{y}}(0) - \mathbf{y}\|$$

Note that

$$\begin{aligned} \|\nabla_{\mathbf{W}} L(s)\| &\leq \sum_{i=1}^n \frac{1}{\sqrt{m}} |\hat{y}_i(s) - y_i| \|\mathbf{E}_i(s)\| (\|\mathbf{U}_i(s)^{-1} \mathbf{u}(s)\| + \|\mathbf{v}(s)\|) \|\mathbf{x}_i\| \\ &\leq \frac{64c\sqrt{n}}{\lambda_0\sqrt{m}} \|\hat{\mathbf{y}}(0) - \mathbf{y}\| \sum_{i=1}^n |\hat{y}_i(s) - y_i| \\ &\leq \frac{64cn}{\lambda_0\sqrt{m}} \|\hat{\mathbf{y}}(0) - \mathbf{y}\| \cdot \|\hat{\mathbf{y}}(s) - \mathbf{y}\| \\ &\leq \frac{64cn}{\lambda_0\sqrt{m}} \|\hat{\mathbf{y}}(0) - \mathbf{y}\|^2 \cdot \exp\{-\lambda_0 s/2\} \end{aligned}$$

so that

$$\begin{aligned} \|\mathbf{W}(t) - \mathbf{W}(0)\| &\leq \int_0^t \|\nabla_{\mathbf{W}} L(s)\| ds \\ &\leq \frac{128cn}{\lambda_0^2\sqrt{m}} \|\hat{\mathbf{y}}(0) - \mathbf{y}\|^2 \\ &\leq \frac{\sqrt{m}\lambda_0}{16c\|\mathbf{X}\|^2} \\ &\leq R. \end{aligned}$$

so that we obtain

$$\|\mathbf{W}(t)\| \leq \|\mathbf{W}(t) - \mathbf{W}(0)\| + \|\mathbf{W}(0)\| \leq 2c\sqrt{m},$$

provided  $c > 0$  is chosen to be large enough, *i.e.*,  $c \gtrsim \sqrt{\lambda_0}/\|\mathbf{X}\|$ . Moreover, it follows from Lemma 3.7 that  $\lambda_{\min}\{\mathbf{G}(t)\} \geq \frac{\lambda_0}{2}$ .

Note that

$$\begin{aligned} \|\nabla_{\mathbf{A}} L(s)\| &\leq \sum_{i=1}^n \frac{\gamma}{\sqrt{m}} |\hat{y}_i(s) - y_i| \|\mathbf{D}_i\| \|\mathbf{U}_i(s)^{-1}\| \|\mathbf{u}(s)\| \|\mathbf{z}_i^*\| \\ &\leq \frac{32c\sqrt{n}}{\lambda_0\sqrt{m}} \|\hat{\mathbf{y}}(0) - \mathbf{y}\| \cdot \sum_{i=1}^n |\hat{y}_i(s) - y_i| \\ &\leq \frac{32cn}{\lambda_0\sqrt{m}} \|\hat{\mathbf{y}}(0) - \mathbf{y}\| \cdot \|\hat{\mathbf{y}}(s) - \mathbf{y}\| \\ &\leq \frac{32cn}{\lambda_0\sqrt{m}} \|\hat{\mathbf{y}}(0) - \mathbf{y}\|^2 \cdot \exp\{-\lambda_0 s/2\}, \end{aligned}$$

so that

$$\begin{aligned} \|\mathbf{A}(t) - \mathbf{A}(0)\| &\leq \int_0^t \|\nabla_{\mathbf{A}} L(s)\| ds \\ &\leq \frac{64cn}{\lambda_0^2\sqrt{m}} \|\hat{\mathbf{y}}(0) - \mathbf{y}\|^2 \end{aligned}$$

Then

$$\|\mathbf{A}(t)\| \leq \|\mathbf{A}(t) - \mathbf{A}(0)\| + \|\mathbf{A}(0)\| \leq 2c\sqrt{m}.$$

□

## A.8 DISCRETE TIME ANALYSIS

In this section, we prove the result for discrete time analysis or result for gradient descent. Assume  $\|\mathbf{A}(0)\| \leq c\sqrt{m}$  and  $\|\mathbf{W}(0)\| \leq c\sqrt{m}$ . Further, we assume  $\lambda_{\min}(\mathbf{G}(0)) \geq \frac{3}{4}\lambda_0$  and we assume  $m = \Omega\left(\frac{c^2 n \|\mathbf{X}\|^2}{\lambda_0^3} \|\hat{\mathbf{y}}(0) - \mathbf{y}\|^2\right)$  and choose  $0 < \gamma \leq \min\{1/2, 1/4c\}$ . Moreover, we assume the stepsize  $\alpha = \mathcal{O}(\lambda_0/n^2)$ . We make the inductive hypothesis as follows for all  $0 \leq s \leq k$

- (i)  $\lambda_{\min}(\mathbf{G}(s)) \geq \frac{\lambda_0}{2}$ ,
- (ii)  $\|\mathbf{u}(s)\| \leq \frac{32c\sqrt{n}}{\lambda_0} \|\hat{\mathbf{y}}(0) - \mathbf{y}\|$ ,
- (iii)  $\|\mathbf{v}(s)\| \leq \frac{16c\sqrt{n}}{\lambda_0} \|\hat{\mathbf{y}}(0) - \mathbf{y}\|$ ,
- (iv)  $\|\mathbf{W}(s)\| \leq 2c\sqrt{m}$ ,
- (v)  $\|\mathbf{A}(s)\| \leq 2c\sqrt{m}$ ,
- (vi)  $\|\hat{\mathbf{y}}(s) - \mathbf{y}\|^2 \leq (1 - \alpha\lambda_0/2)^s \|\hat{\mathbf{y}}(0) - \mathbf{y}\|^2$ .

*Proof.* By using the inductive hypothesis, we have for any  $0 \leq s \leq k$

$$\|\phi_i(s)\| = \left\| \frac{1}{\sqrt{m}} \sigma(\mathbf{W}(s) \mathbf{x}_i) \right\| \leq \frac{1}{\sqrt{m}} \|\mathbf{W}(s)\| \leq 2c$$

and

$$\|\Phi(s)\| \leq \|\Phi(s)\|_F = \left( \sum_{i=1}^n \|\phi_i(s)\|^2 \right)^{1/2} \leq 2c\sqrt{n}. \quad (38)$$

By using Lemma 3.2, we obtain the upper bound for the equilibrium point  $\mathbf{z}_i(s)$  for any  $0 \leq s \leq k$  as follows

$$\|\mathbf{z}_i(s)\| \leq \frac{1}{1 - \gamma_0} \|\phi_i(s)\| = 2\|\phi_i(s)\| \leq 4c,$$

where the last inequality is because we choose  $\gamma_0 = 1/2$ , and

$$\|\mathbf{Z}(s)\| \leq \|\mathbf{Z}(s)\|_F = \left( \sum_{i=1}^n \|\mathbf{z}_i(s)\|^2 \right)^{1/2} = 4c\sqrt{n}. \quad (39)$$

By using the upper bound of  $\phi_i(s)$ , we obtain for any  $0 \leq s \leq k$

$$\begin{aligned} \|\nabla_{\mathbf{v}} L(s)\| &\leq \sum_{i=1}^n |\hat{y}_i(s) - y_i| \|\phi_i(s)\| \\ &\leq 2c \sum_{i=1}^n |\hat{y}_i(s) - y_i| \\ &\leq 2c\sqrt{n} \|\hat{\mathbf{y}}(s) - \mathbf{y}\| \\ &\leq 2c\sqrt{n} (1 - \alpha\lambda_0/2)^{s/2} \|\hat{\mathbf{y}}(0) - \mathbf{y}\|. \end{aligned}$$

Let  $\beta := \sqrt{1 - \alpha\lambda_0/2}$ . Then the upper bound of  $\|\nabla_{\mathbf{v}} L(s)\|$  can be written as

$$\|\nabla_{\mathbf{v}} L(s)\| \leq 2c\sqrt{n}\beta^s \|\hat{\mathbf{y}}(0) - \mathbf{y}\|, \quad (40)$$

and

$$\begin{aligned} \|\mathbf{v}(k+1) - \mathbf{v}(0)\| &\leq \sum_{s=0}^k \|\mathbf{v}(s+1) - \mathbf{v}(s)\| = \alpha \sum_{s=0}^k \|\nabla_{\mathbf{v}} L(s)\| \\ &\leq \alpha \cdot 2c\sqrt{n} \|\hat{\mathbf{y}}(0) - \mathbf{y}\| \cdot \sum_{s=0}^k \beta^s \\ &= \frac{2(1 - \beta^2)}{\lambda_0} \cdot 2c\sqrt{n} \|\hat{\mathbf{y}}(0) - \mathbf{y}\| \frac{1 - \beta^{k+1}}{1 - \beta} \\ &\leq \frac{8c\sqrt{n}}{\lambda_0} \|\hat{\mathbf{y}}(0) - \mathbf{y}\|, \end{aligned}$$

where the last inequality we use the facts  $\beta < 1$ . By triangle inequality, we obtain

$$\|\mathbf{v}(k+1)\| \leq \|\mathbf{v}(k+1) - \mathbf{v}(0)\| + \|\mathbf{v}(0)\| \leq \frac{16c\sqrt{n}}{\lambda_0} \|\hat{\mathbf{y}}(0) - \mathbf{y}\|,$$

which proves the result (iii). Similarly, we can upper bound the gradient of  $\mathbf{u}$

$$\|\nabla_{\mathbf{u}} L(s)\| \leq \sum_{i=1}^n |\hat{y}_i(s) - y_i| \|\mathbf{z}_i\| \leq 4c\sqrt{n} \|\hat{\mathbf{y}}(s) - \mathbf{y}\| \leq 4c\sqrt{n}\beta^s \|\hat{\mathbf{y}}(0) - \mathbf{y}\| \quad (41)$$

so that

$$\|\mathbf{u}(k+1) - \mathbf{u}(0)\| \leq \frac{16c\sqrt{n}}{\lambda_0} \|\hat{\mathbf{y}} - \mathbf{y}\|,$$

and

$$\|\mathbf{u}(k)\| \leq \|\mathbf{u}(k) - \mathbf{u}(0)\| + \|\mathbf{u}(0)\| \leq \frac{32c\sqrt{n}}{\lambda_0} \|\hat{\mathbf{y}}(0) - \mathbf{y}\|.$$

The result (ii) is also obtained.

By using the inductive hypothesis, we can upper bound the gradient of  $\mathbf{W}$  as follows

$$\begin{aligned} \|\nabla_{\mathbf{W}} L(s)\| &\leq \sum_{i=1}^n \frac{1}{\sqrt{m}} |\hat{y}_i(s) - y_i| \|\mathbf{E}_i(s)\| (\|\mathbf{U}_i(s)^{-1} \mathbf{u}(s)\| + \|\mathbf{v}(s)\|) \|\mathbf{x}_i\| \\ &\leq \frac{128c\sqrt{n}}{\lambda_0\sqrt{m}} \|\hat{\mathbf{y}}(0) - \mathbf{y}\| \sum_{i=1}^n |\hat{y}_i(s) - y_i| \\ &\leq \frac{128cn}{\lambda_0\sqrt{m}} \|\hat{\mathbf{y}}(0) - \mathbf{y}\| \cdot \|\hat{\mathbf{y}}(s) - \mathbf{y}\| \\ &\leq \frac{128cn}{\lambda_0\sqrt{m}} \|\hat{\mathbf{y}}(0) - \mathbf{y}\|^2 \cdot \beta^s \end{aligned} \quad (42)$$

so that

$$\begin{aligned} \|\mathbf{W}(k+1) - \mathbf{W}(0)\| &\leq \alpha \sum_{s=0}^k \|\nabla_{\mathbf{W}} L(s)\| \\ &\leq \alpha \cdot \frac{128cn}{\lambda_0^2\sqrt{m}} \|\hat{\mathbf{y}}(0) - \mathbf{y}\|^2 \cdot \sum_{s=0}^k \beta^s \\ &\leq \frac{512cn}{\lambda_0^2\sqrt{m}} \|\hat{\mathbf{y}}(0) - \mathbf{y}\|^2 \\ &\leq \frac{\sqrt{m}\lambda_0}{16c\|\mathbf{X}\|^2} \\ &\leq R, \end{aligned}$$

where the third inequality holds is because  $m$  is large, *i.e.*,  $m = \Theta(\frac{c^2 n \|\mathbf{X}\|^2}{\lambda_0^3} \|\hat{\mathbf{y}}(0) - \mathbf{y}\|^2)$ . To simplify the notation, we assume

$$m = \frac{Cc^2 n \|\mathbf{X}\|^2}{\lambda_0^3} \|\hat{\mathbf{y}}(0) - \mathbf{y}\|^2 \quad (43)$$

for some large number  $C > 0$ . Moreover, we obtain

$$\|\mathbf{W}(k+1)\| \leq \|\mathbf{W}(k+1) - \mathbf{W}(0)\| + \|\mathbf{W}(0)\| \leq 2c\sqrt{m},$$

provided  $c > 0$  is chosen to be large enough, *i.e.*,  $c \gtrsim \sqrt{\lambda_0}/\|\mathbf{X}\|$ . Therefore, it follows from Lemma 3.7 that  $\lambda_{\min}\{\mathbf{G}(k+1)\} \geq \frac{\lambda_0}{2}$ . Thus, the results (i) and (iv) are established.

By using similar argument, we can upper bound the gradient of  $\mathbf{A}$  as follows Note that

$$\begin{aligned}
\|\nabla_{\mathbf{A}} L(s)\| &\leq \sum_{i=1}^n \frac{\gamma}{\sqrt{m}} |\hat{y}_i(s) - y_i| \|\mathbf{D}_i\| \|\mathbf{U}_i(s)^{-1}\| \|\mathbf{u}(s)\| \|\mathbf{z}_i^*\| \\
&\leq \frac{64c\sqrt{n}}{\lambda_0\sqrt{m}} \|\hat{\mathbf{y}}(0) - \mathbf{y}\| \cdot \sum_{i=1}^n |\hat{y}_i(s) - y_i| \\
&\leq \frac{64cn}{\lambda_0\sqrt{m}} \|\hat{\mathbf{y}}(0) - \mathbf{y}\| \cdot \|\hat{\mathbf{y}}(s) - \mathbf{y}\| \\
&\leq \frac{64cn}{\lambda_0\sqrt{m}} \|\hat{\mathbf{y}}(0) - \mathbf{y}\|^2 \cdot \beta^s,
\end{aligned}$$

so that

$$\begin{aligned}
\|\mathbf{A}(k+1) - \mathbf{A}(0)\| &\leq \alpha \sum_{s=0}^k \|\nabla_{\mathbf{A}} L(s)\| \\
&\leq \alpha \cdot \frac{64cn}{\lambda_0\sqrt{m}} \|\hat{\mathbf{y}}(0) - \mathbf{y}\|^2 \cdot \sum_{s=0}^k \beta^s \\
&\leq \frac{256cn}{\lambda_0^2\sqrt{m}} \|\hat{\mathbf{y}}(0) - \mathbf{y}\|^2
\end{aligned}$$

Since  $m \geq \frac{Cc^2n\|\mathbf{X}\|^2}{\lambda_0^3} \|\hat{\mathbf{y}}(0) - \mathbf{y}\|^2$  and  $c, C > 0$  is large enough, we have

$$\|\mathbf{A}(k+1)\| \leq \|\mathbf{A}(k+1) - \mathbf{A}(0)\| + \|\mathbf{A}(0)\| \leq 2c\sqrt{m}.$$

Therefore, the result (v) is obtained and the equilibrium points  $\mathbf{z}_i(k+1)$  exists for all  $i \in [n]$ .

To establish the result (vi), we need to derive the bounds between equilibrium points and feature vectors. Next, we will bound the difference between equilibrium points  $\mathbf{z}_i(k+1)$  and  $\mathbf{z}_i(k)$ . For any  $\ell \geq 1$ , we have

$$\begin{aligned}
\|\mathbf{z}_i^{\ell+1}(k+1) - \mathbf{z}_i^\ell(k)\| &= \|\sigma[\tilde{\gamma}\mathbf{A}(k+1)\mathbf{z}_i^\ell(k+1) + \phi_i(k+1)] - \sigma[\tilde{\gamma}\mathbf{A}(k)\mathbf{z}_i^\ell(k) + \phi_i(k)]\| \\
&\leq \|\tilde{\gamma}\mathbf{A}(k+1)\mathbf{z}_i^\ell(k+1) + \phi_i(k+1) - \tilde{\gamma}\mathbf{A}(k)\mathbf{z}_i^\ell(k) - \phi_i(k)\| \\
&\leq \tilde{\gamma}\|\mathbf{A}(k+1)\mathbf{z}_i^\ell(k+1) - \mathbf{A}(k)\mathbf{z}_i^\ell(k)\| + \|\phi_i(k+1) - \phi_i(k)\|,
\end{aligned}$$

where the first term can be bounded as follows

$$\begin{aligned}
&\tilde{\gamma}\|\mathbf{A}(k+1) - \mathbf{A}(k)\| \|\mathbf{z}_i^\ell(k+1)\| + \tilde{\gamma}\|\mathbf{A}(k)\| \|\mathbf{z}_i^\ell(k+1) - \mathbf{z}_i^\ell(k)\| \\
&\leq \tilde{\gamma}\alpha\|\nabla_{\mathbf{A}} L(k)\|(4c) + \tilde{\gamma}\|\mathbf{A}(k)\| \|\mathbf{z}_i^\ell(k+1) - \mathbf{z}_i^\ell(k)\| \\
&\leq \frac{64\alpha cn}{\lambda_0 m} \|\hat{\mathbf{y}}(0) - \mathbf{y}\|^2 \beta^k + (1/2) \|\mathbf{z}_i^\ell(k+1) - \mathbf{z}_i^\ell(k)\|,
\end{aligned}$$

and the second term is bounded as follows

$$\begin{aligned}
\frac{1}{\sqrt{m}} \|\sigma[\mathbf{W}(k+1)\mathbf{x}_i] - \sigma[\mathbf{W}(k)\mathbf{x}_i]\| &\leq \frac{1}{\sqrt{m}} \|\mathbf{W}(k+1) - \mathbf{W}(k)\| \|\mathbf{x}_i\| \\
&\leq \frac{\alpha}{\sqrt{m}} \|\nabla_{\mathbf{W}} L(k)\| \\
&\leq \frac{128\alpha cn}{\lambda_0 m} \|\hat{\mathbf{y}}(0) - \mathbf{y}\|^2 \cdot \beta^k.
\end{aligned}$$

Thus, we obtain

$$\begin{aligned}
\|\mathbf{z}_i^{\ell+1}(k+1) - \mathbf{z}_i^\ell(k)\| &\leq (1/2) \|\mathbf{z}_i^\ell(k+1) - \mathbf{z}_i^\ell(k)\| + \frac{256\alpha cn}{\lambda_0 m} \|\hat{\mathbf{y}}(0) - \mathbf{y}\|^2 \cdot \beta^k \\
&\leq (1/2)^\ell \|\mathbf{z}_i^1(k+1) - \mathbf{z}_i^1(k)\| + \frac{256\alpha cn}{\lambda_0 m} \|\hat{\mathbf{y}}(0) - \mathbf{y}\|^2 \cdot \beta^k \cdot \sum_{j=0}^{\infty} 2^{-j} \\
&\leq (1/2)^\ell \|\mathbf{z}_i^1(k+1) - \mathbf{z}_i^1(k)\| + \frac{512\alpha cn}{\lambda_0 m} \|\hat{\mathbf{y}}(0) - \mathbf{y}\|^2 \cdot \beta^k.
\end{aligned}$$

Let  $\ell \rightarrow \infty$ , then we obtain

$$\|z_i(k+1) - z_i(k)\| \leq \frac{512\alpha cn}{\lambda_0 m} \|\hat{\mathbf{y}}(0) - \mathbf{y}\|^2 \cdot \beta^k.$$

By using the Cauchy-Schwartz inequality, we have

$$\|\mathbf{Z}(k+1) - \mathbf{Z}(k)\| \leq \|\mathbf{Z}(k+1) - \mathbf{Z}(k)\|_F \leq \frac{512\alpha cn^{3/2}}{\lambda_0 m} \|\hat{\mathbf{y}}(0) - \mathbf{y}\|^2 \cdot \beta^k. \quad (44)$$

In addition, we will also bound the difference in  $\phi_i(k+1)$  and  $\phi_i(k)$ . Note that

$$\|\phi_i(k+1) - \phi_i(k)\| = \frac{1}{\sqrt{m}} \|\sigma[\mathbf{W}(k+1)\mathbf{x}_i] - \sigma[\mathbf{W}(k)\mathbf{x}_i]\| \leq \frac{128\alpha cn}{\lambda_0 m} \|\hat{\mathbf{y}}(0) - \mathbf{y}\|^2 \cdot \beta^k,$$

so that

$$\|\Phi(k+1) - \Phi(k)\| \leq \|\Phi(k+1) - \Phi(k)\|_F \leq \frac{128\alpha cn^{3/2}}{\lambda_0 m} \|\hat{\mathbf{y}}(0) - \mathbf{y}\|^2 \cdot \beta^k \quad (45)$$

Now, we are ready to establish the result (vi). Note that

$$\begin{aligned} \|\hat{\mathbf{y}}(k+1) - \mathbf{y}\|^2 &= \|\hat{\mathbf{y}}(k+1) - \hat{\mathbf{y}}(k) + \hat{\mathbf{y}}(k) - \mathbf{y}\|^2 \\ &= \|\hat{\mathbf{y}}(k+1) - \hat{\mathbf{y}}(k)\|^2 + 2\langle \hat{\mathbf{y}}(k+1) - \hat{\mathbf{y}}(k), \hat{\mathbf{y}}(k) - \mathbf{y} \rangle + \|\hat{\mathbf{y}}(k) - \mathbf{y}\|^2. \end{aligned}$$

In the rest of this proof, we will bound each term in the above inequality. By the prediction rule of  $\hat{\mathbf{y}}$ , we can bound the difference between  $\hat{\mathbf{y}}(k+1)$  and  $\hat{\mathbf{y}}(k)$  as follows

$$\begin{aligned} \|\hat{\mathbf{y}}(k+1) - \hat{\mathbf{y}}(k)\| &= \|\mathbf{Z}(k+1)\mathbf{u}(k+1) + \Phi(k+1)\mathbf{v}(k+1) - \mathbf{Z}(k)\mathbf{u}(k) - \Phi(k)\mathbf{v}(k)\| \\ &\leq \|\mathbf{Z}(k+1)\mathbf{u}(k+1) - \mathbf{Z}(k)\mathbf{u}(k)\| + \|\Phi(k+1)\mathbf{v}(k+1) - \Phi(k)\mathbf{v}(k)\|, \end{aligned}$$

where the first term can be bounded as follows by using equation 39, 41, 43, 44, hypothesis (ii), and a large constant  $C_0 > 0$

$$\begin{aligned} &\|\mathbf{Z}(k+1)\| \|\mathbf{u}(k+1) - \mathbf{u}(k)\| + \|\mathbf{Z}(k+1) - \mathbf{Z}(k)\| \|\mathbf{u}(k)\| \\ &= \alpha \|\mathbf{Z}(k+1)\| \|\nabla_{\mathbf{u}} L(k)\| + \|\mathbf{Z}(k+1) - \mathbf{Z}(k)\| \|\mathbf{u}(k)\| \\ &\leq \alpha C_0 c^2 n \|\hat{\mathbf{y}}(0) - \mathbf{y}\| \cdot \beta^k, \end{aligned}$$

and the second term is bounded as follows by using equation 38, 40, 45, 43, hypothesis (iii), and a large constant  $C_0 > 0$

$$\begin{aligned} &\|\Phi(k+1)\| \|\mathbf{v}(k+1) - \mathbf{v}(k)\| + \|\Phi(k+1) - \Phi(k)\| \|\mathbf{v}(k)\| \\ &= \alpha \|\Phi(k+1)\| \|\nabla_{\mathbf{v}} L(k)\| + \|\Phi(k+1) - \Phi(k)\| \|\mathbf{v}(k)\| \\ &\leq \alpha C_0 c^2 n \|\hat{\mathbf{y}}(0) - \mathbf{y}\| \cdot \beta^k. \end{aligned}$$

Therefore, we have

$$\|\hat{\mathbf{y}}(k+1) - \hat{\mathbf{y}}(k)\| \leq \alpha C_0 c^2 n \|\hat{\mathbf{y}}(0) - \mathbf{y}\| \cdot \beta^k, \quad (46)$$

where the scalar 2 is absorbed in  $C_0$  and the constant  $C_0$  is difference from  $C$ .

Let  $\mathbf{g} := \mathbf{Z}(k)\mathbf{u}(k+1) + \Phi(k)\mathbf{v}(k+1)$ . Then we have

$$\langle \hat{\mathbf{y}}(k+1) - \hat{\mathbf{y}}(k), \hat{\mathbf{y}}(k) - \mathbf{y} \rangle = \langle \hat{\mathbf{y}}(k+1) - \mathbf{g}, \hat{\mathbf{y}}(k) - \mathbf{y} \rangle + \langle \mathbf{g} - \hat{\mathbf{y}}(k), \hat{\mathbf{y}}(k) - \mathbf{y} \rangle.$$

Let us bound each term individually. By using Cauchy-Schwartz inequality, we have

$$\begin{aligned} &\langle \hat{\mathbf{y}}(k+1) - \mathbf{g}, \hat{\mathbf{y}}(k) - \mathbf{y} \rangle \\ &= \langle (\mathbf{Z}(k+1) - \mathbf{Z}(k))\mathbf{u}(k+1), \hat{\mathbf{y}}(k) - \mathbf{y} \rangle + \langle (\Phi(k+1) - \Phi(k))\mathbf{v}(k+1), \hat{\mathbf{y}}(k) - \mathbf{y} \rangle \\ &\leq (\|\mathbf{Z}(k+1) - \mathbf{Z}(k)\| \|\mathbf{u}(k+1)\| + \|\Phi(k+1) - \Phi(k)\| \|\mathbf{v}(k+1)\|) \|\hat{\mathbf{y}}(k) - \mathbf{y}\| \\ &\leq \alpha C_0 c^2 n \|\hat{\mathbf{y}}(0) - \mathbf{y}\| \cdot \beta^k \|\hat{\mathbf{y}}(k) - \mathbf{y}\|, \quad \text{by equation 39, 41, 43, 44} \\ &\leq \alpha C_0 c^2 n \cdot \beta^{2k} \|\hat{\mathbf{y}}(0) - \mathbf{y}\|^2. \end{aligned} \quad (47)$$



By using  $\nabla_{\mathbf{u}} L(k) = \mathbf{Z}(k)^T (\hat{\mathbf{y}}(k) - \mathbf{y})$ ,  $\nabla_{\mathbf{v}} L(k) = \mathbf{\Phi}(k)^T (\hat{\mathbf{y}}(k) - \mathbf{y})$  and  $\lambda_{\min}(\mathbf{G}(k)) \geq \lambda_0/2$ , we get

$$\begin{aligned} \langle \mathbf{g} - \hat{\mathbf{y}}(k), \hat{\mathbf{y}}(k) - \mathbf{y} \rangle &= -\alpha (\hat{\mathbf{y}}(k) - \mathbf{y})^T [\mathbf{Z}(k)\mathbf{Z}(k)^T + \mathbf{\Phi}(k)\mathbf{\Phi}(k)^T] (\hat{\mathbf{y}}(k) - \mathbf{y}) \\ &\leq -\frac{\alpha\lambda_0}{2} \|\hat{\mathbf{y}}(k) - \mathbf{y}\|^2. \end{aligned} \quad (48)$$

By combining the inequalities equation 46, 47, 48, we obtain

$$\begin{aligned} \|\hat{\mathbf{y}}(k+1) - \mathbf{y}\|^2 &\leq (1 - \alpha [\lambda_0 - C_0 c^2 n - \alpha C_0^2 c^4 n^2]) \beta^{2k} \|\hat{\mathbf{y}}(0) - \mathbf{y}\|^2 \\ &\leq \left(1 - \frac{\alpha\lambda_0}{2}\right) \beta^{2k} \|\hat{\mathbf{y}}(0) - \mathbf{y}\|^2 \\ &= \left(1 - \frac{\alpha\lambda_0}{2}\right)^{k+1} \|\hat{\mathbf{y}}(0) - \mathbf{y}\|^2, \end{aligned}$$

where the second inequality is due to  $\alpha = \mathcal{O}(\frac{\lambda_0}{n^2})$ . This proves the result (vi) and complete the whole proof. □
